# Supplementary material
Source: PubMed Central journal article supplement (PMC2366852)

**E07-08-0811 Torres-Aleman**

**Supplemental Figure**

Supplemental Figure 1: **A**, Modulation of the subcellular distribution of FOXO by IGF-I and H<sub>2</sub>O<sub>2</sub>. In the presence of IGF-I, FOXO was located in the neuronal cytoplasm, while when H<sub>2</sub>O<sub>2</sub> was added to IGF-I-treated neurons FOXO was retained in the cell nucleus. Immunocytochemical analyses was performed 4 hours after exposure to H<sub>2</sub>O<sub>2</sub>. **B**, Differential phosphorylation of FOXO by IGF-I and H<sub>2</sub>O<sub>2</sub>. Enhanced levels of phospho-FOXO3 at the AKT-sensitive residue Ser<sup>253</sup> 4 hours after IGF-I addition were reduced in the presence of H<sub>2</sub>O<sub>2</sub>. n= 4. **C**, H<sub>2</sub>O<sub>2</sub> does not affect IGF-I receptor phosphorylation. Co-addition of H<sub>2</sub>O<sub>2</sub> (50 μM) with IGF-I (100 nM) to neuronal cultures did not affect Tyr-phosphorylation of the IGF-I receptor. A representative blot is shown. Histograms show densitometric quantification of IGF-I and IGF-I+ H<sub>2</sub>O<sub>2</sub>-treated cultures. No significant differences were appreciated (n= 3). **D**, Differential association of IRS-1 with 14-3-3 after IGF-I and H<sub>2</sub>O<sub>2</sub>. Addition of IGF-I to cultures reduces the interaction of IRS-1 with 14-3-3β fifteen min later, while H<sub>2</sub>O<sub>2</sub> maintains this association. Reciprocal immunoprecipitations (IP) are shown. Upper blot: IP 14-3-3β and WB IRS-1. Lower blots, the opposite (n= 3). **E**, Levels of phospho-JNK2 are not modify at early times after H<sub>2</sub>O<sub>2</sub>. Addition of 50 μM H<sub>2</sub>O<sub>2</sub> to IGF-I-treated cerebellar neurons did not affect JNK2 activity at 15 min as determined by levels of phospho-JNK2. Representative blot is shown (n= 5). Histograms: quantitation of blots.

**A**

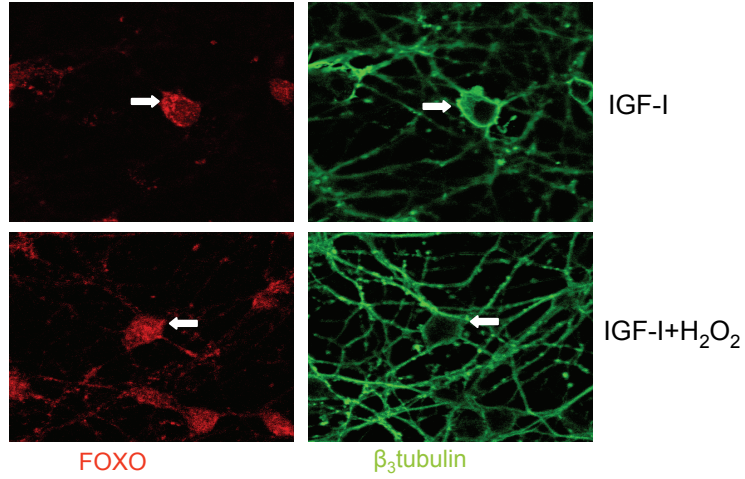

**B**

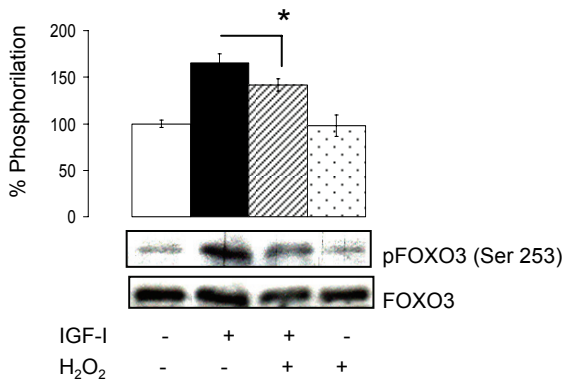

**C**

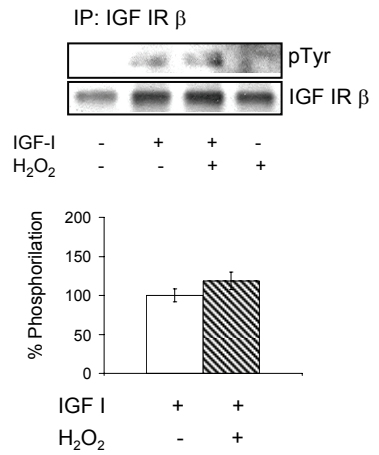

**D**

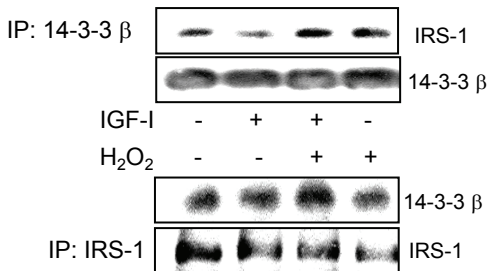

**E**

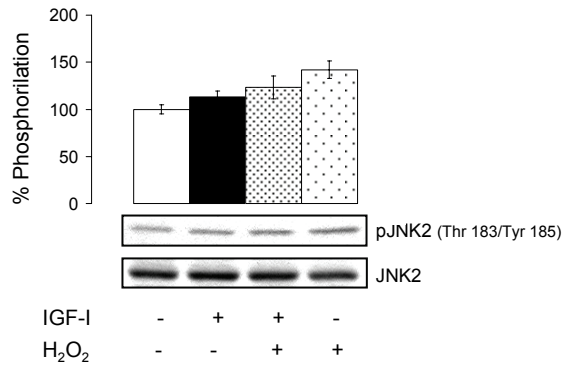

Supplement: mbc_E07-08-0811_1.pdf [file mbc_E07-08-0811_1.pdf]
